# Supplementary material for: Synthesis of hybrid carbon spheres@nitrogen-doped graphene/carbon nanotubes and their oxygen reduction activity performance
Source: Royal Society of Chemistry journal article supplement (doi:10.1039/c6ra00819d), 2016-01-01
Supplement: c6ra00819d1.pdf [file c6ra00819d1.pdf]

### Supporting Information

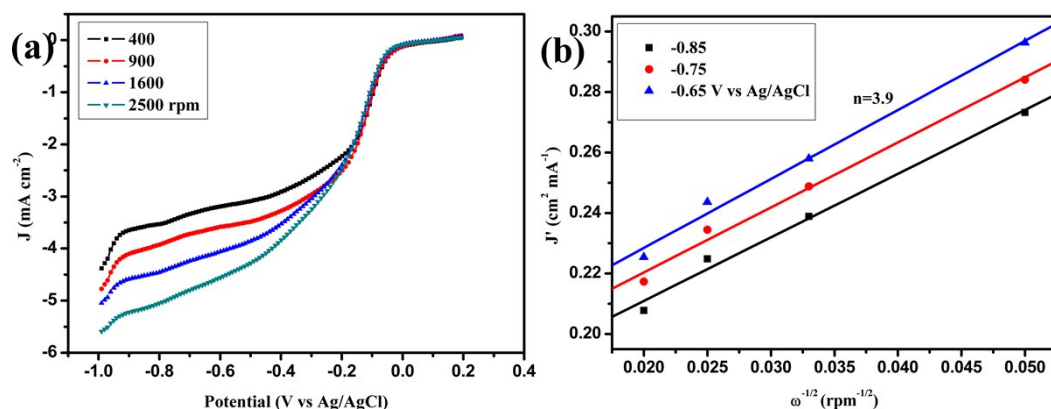

**Figure S1.** (a) RDE polarization curves at different rotation rates for ORR on GC with predeposited Pt/C in a 0.1 M KOH solution saturated with oxygen at the scan rate of 20 mV s<sup>-1</sup>. (b) Plot of  $J^{-1}$  vs  $\omega^{-1/2}$  for oxygen reduction on GC with precoated Pt/C at potentials -0.65, -0.75 and -0.85V.
